# Supplementary material for: Novel Methods in Disease Biogeography: A Case Study with Heterosporosis
Source: PubMed Central journal article supplement (PMC5511963; doi:10.3389/fvets.2017.00105), 2017-07-17
Supplement: data_sheet_2.pdf [file data_sheet_2.pdf]

## 2 Supplementary Material S2

### #Detect outliers

```
#Load functions
```

```
source("functions.R")
```

```
#Load environmental layers
```

```
environment_layers<-  
paste("/Users/huijieqiao/Experiments/Heterosporis/current_10min_cut/",
```

```
list.files("/Users/huijieqiao/Experiments/Heterosporis/current_10min_cut/"  
)  
  
sep="")
```

```
#Load occurrences
```

```
occ<-read.table("HTSP_11.csv", head=T, sep=",")
```

```
#Set up parameters
```

```
is_pca<-T
```

```
first_pcs<--1
```

```
proportion_threshold<-0.85
```

```
max_removed_occurrences<-10000
```

```
tolerance<-0.01
```

```
#Detect outliers
```

```
DETECT_OUTLIER(occ, environment_layers, max_removed_occurrences=1)
```

```
#Export results
save(mve_definitions, vol_list, file = "result.RData")
```

## **function.R**

```
require(geometry)
library(raster)
library(rgdal)
library(dplyr)
##begin of functions

#Get the definition of MVE
MVE_DEFINITION<-function(samples, tolerance = 0.01){
  mve<-MinVolEllipse(samples, tolerance)
  return (mve)
}

#Test the point is inside of a given MVE or not
IN_MVE<-function(all_samples, definition, dimension){

  mve_a<-definition[[1]]
  mve_c<-definition[[2]]
  sub_d<-as.matrix(all_samples)
  result<-logical(length(sub_d)/dimension)
  for (i in 1:(length(sub_d)/dimension)){
```

```

x<-as.matrix(sub_d[i,])
distance <- t(x-mve_c)%**mve_a**%(x-mve_c)
if ((distance[1]-1)<=0.001){
  result[i] <- TRUE
}else{
  result[i] <- FALSE
}
}
return(result)
}

#Define the %^% symbol
"%^%" <- function(S, power)
  with(eigen(S), vectors %** (values^power * t(vectors)))

#Generate MVE
MinVolEllipse<-function(P, tolerance){
  ##P<-true_set
  ch <- convhulln(P)
  vex <- unique(as.integer(ch))
  P<-P[vex,]
  P<-t(as.matrix(P))

  d<-dim(P)[1]
  N<-dim(P)[2]

```

```

Q<-matrix(0,nr=d+1,nc=N)
Q[1:d,]<-P[1:d,1:N]
Q[1+d,]<-1
count<-err<-1
u<-rep(1/N,N)
while(err>tolerance){
  X<-Q%%diag(u,N,N)%%t(Q)
  M<-diag(t(Q)%%solve(X)%%Q)
  maxM<-max(M)
  j<-order(M)[N]
  step.size<-(maxM-d-1)/((d+1)*(maxM-1))
  new.u<-(1-step.size)*u
  new.u[j]<-new.u[j]+step.size
  count<-count+1
  ll<-svd(new.u-u)
  err<-max(ll[[1]])
  u<-new.u
}
U<-diag(u,N,N)
A<-solve(P%%U%%t(P)-(P%%u)%%t(P%%u))/d
c<-P%%u
return(list(A,c))
}

```

#Calculate the volume of a given ellipsoid

```
VOLUME_MVE<-function(definition){
```

```

mve_a<-definition[[1]]
mve_c<-definition[[2]]
volume<-(4/3) * pi * sqrt(det(mve_a%%-1))
return(volume)
}

```

```
ELLIPSEM <-
```

```

function (mu, amat, c2, npoints = 100, showcentre = T, ...)
{
  if (all(dim(amat) == c(2, 2))) {
    eamat <- eigen(amat)
    hlen <- sqrt(c2/eamat$val)
    theta <- angle(eamat$vec[1, 1], eamat$vec[2, 1])
    ellipse(hlen[1], hlen[2], theta, mu[1], mu[2], npoints = npoints,
            ...)
    if (showcentre)
      points(mu[1], mu[2], pch = 3)
  }
  invisible()
}

```

```
ellipse <-
```

```

function (hlaxa = 1, hlaxb = 1, theta = 0, xc = 0, yc = 0, newplot = F,
          npoints = 100, ...)

```

```

{
  a <- seq(0, 2 * pi, length = npoints + 1)
  x <- hlaxa * cos(a)
  y <- hlaxb * sin(a)
  alpha <- angle(x, y)
  rad <- sqrt(x^2 + y^2)
  xp <- rad * cos(alpha + theta) + xc
  yp <- rad * sin(alpha + theta) + yc
  if (newplot)
    plot(xp, yp, type = "l", ...)
  else lines(xp, yp, ...)
  invisible()
}

```

```
angle <-
```

```

function (x, y)
{
  angle2 <- function(xy) {
    x <- xy[1]
    y <- xy[2]
    if (x > 0) {
      atan(y/x)
    }
    else {
      if (x < 0 & y != 0) {
        atan(y/x) + sign(y) * pi
      }
    }
  }
}

```

```

else {
  if (x < 0 & y == 0) {
    pi
  }
  else {
    if (y != 0) {
      (sign(y) * pi)/2
    }
    else {
      NA
    }
  }
}
}
}
}
}

apply(cbind(x, y), 1, angle2)
}

##end of functions

DETECT_OUTLIER<-function(occ, environment_layers,
                          is_pca=T, first_pcs=3, proportion_threshold=0.85,
                          max_removed_occurrences=100, tolerance = 0.01){
  ##begin of the function
  #read all the raster files
  for (i in c(1:length(environment_layers))){

```

```

print(paste("Reading raster file", environment_layers[i]))
r <- raster(environment_layers[i])
v_r<-values(r)
if (i==1){
  r_standard <- v_r
  raster_list<-stack(r)
}else{
  raster_list<-addLayer(raster_list, r)
}
v_r <- v_r[which(!is.na(r_standard))]

if (i==1){
  d_o<-data.frame(ID=c(1:length(v_r)))
}
d_o[,paste("V", i, sep="")] <- v_r
}

if (is_pca){
  # PCA
  pca <- prcomp(d_o[, c(2: dim(d_o)[2])],
               center = T,
               scale. = T)

  vars <- apply(pca$x, 2, var)

```



```

props_value <- vars / sum(vars)

current_proportion<-0
prop_index<-0
if (first_pcs==-1){
  while (current_proportion<=proportion_threshold){
    prop_index<-prop_index+1
    current_proportion<-current_proportion + props_value[prop_index]
  }
}else{
  prop_index<-first_pcs
  if (prop_index>length(props_value)){
    stop("first_pcs larger then number of variables.")
  }
}

# Generate PCs
p_d<-predict(pca,
             newdata=d_o[, c(2: dim(d_o)[2])])

sample_raster<-raster(raster_list, layer=1)

for (i in c(1:dim(p_d)[2])){
  #print(paste("Saving PC", i, "/", dim(p_d)[2]))

```

```

values(sample_raster)<-NA
values(sample_raster)[which(!is.na(r_standard))]<-p_d[,i]
names(sample_raster)<-paste("PC", i, sep="")
if (i==1){
  pc_list<-stack(sample_raster)
}else{
  pc_list<-addLayer(pc_list, sample_raster)
}
}

raster_list<-pc_list
}else{
  prop_index<-nlayers(raster_list)
}

prop_index=2

sp <- SpatialPoints(occ)
env_values<-extract(raster_list, sp)
env_values<-env_values[,1:prop_index]
dim(env_values)

train_d<-data.frame(occ, env_values)
#train_d<-train_d[!duplicated(train_d[,c(3:(2+prop_index))]),]

train_d[!complete.cases(train_d),]

```

```

env_values<-as.matrix(train_d[,c(3:(2+prop_index))])
plot(c(-4, 4), c(-6, 8), type="n",
     xlab="Axis 1",
     ylab="Axis 2" )
points(train_d$PC1, train_d$PC2)
mve_definition <- MVE_DEFINITION(env_values, 0.01)

ELLIPSEM(mve_definition[[2]][1:2,],mve_definition[[1]][1:2,1:2],
         npoints=100,c2=1,col='red', showcentre=F)

mve_definitions<-list(mve_definition)
vol<-VOLUME_MVE(mve_definition)
id<-1
vol_list<-data.frame(id=id, x=0, y=0, vol=vol)
old_train_d<-train_d
occurrences_threshold<-dim(train_d)[1]-max_removed_occurrences
if (occurrences_threshold<5){
  occurrences_threshold<-5
}

if (occurrences_threshold<=prop_index){
  occurrences_threshold<-prop_index+1
}

```

```

while (dim(train_d)[1]>occurrences_threshold){
  print(paste("Occurrence size:", dim(train_d)[1]))
  min_vol<--1
  min_index<--1

  for (i in c(1:dim(train_d)[1])){
    print(dim(train_d)[1] - i)
    env_values<-as.matrix(train_d[,c(3:(2+prop_index))])
    env_values<-env_values[-i,]
    mve_definition <- MVE_DEFINITION(env_values, tolerance)
    vol<-VOLUME_MVE(mve_definition)
    if (min_vol== -1){
      min_vol<-vol
      min_index<-i
      min_mve_definition<-mve_definition
    }
    if (vol<min_vol){
      min_vol<-vol
      min_index<-i
      min_mve_definition<-mve_definition
    }
  }

  #Draw an ellipsoid in a plot
  ELLIPSEM(min_mve_definition[[2]][1:2,],min_mve_definition[[1]][1:2,1:2],
           npoints=100,c2=1, col='red', showcentre=T)
}

```

```

id<-id+1
mve_definitions[[id]]<-min_mve_definition
vol_list<-rbind(vol_list,
                data.frame(id=id, x=train_d[min_index, 1],
                           y=train_d[min_index, 2], vol=min_vol))
print(paste("Remove No.", min_index))
print(train_d[min_index,])

ELLIPSEM(min_mve_definition[[2]][1:2,],min_mve_definition[[1]][1:2,1:2],
         npoints=100,c2=1, col='blue', showcentre=T)
train_d<-train_d[-min_index,]

}
result<-list(mve=mve_definitions, vol=vol_list)

env_values<-as.matrix(old_train_d[,c(3:(2+prop_index))])

mve_definition <- MVE_DEFINITION(env_values, 0.01)

ELLIPSEM(mve_definition[[2]][1:2,],mve_definition[[1]][1:2,1:2],
         npoints=100,c2=1,col='black', showcentre=F)

return(result)
}

```
