# Supplementary material for: Novel Methods in Disease Biogeography: A Case Study with Heterosporosis
Source: PubMed Central journal article supplement (PMC5511963; doi:10.3389/fvets.2017.00105), 2017-07-17
Supplement: data_sheet_3.pdf [file data_sheet_3.pdf]

### 3 Supplementary Material S3

```
#Split occurrence data in two groups
```

```
#This is not a detailed explanation but just an example of the process  
employed to generate two independent sets of occurrences for calibration  
and evaluation.
```

```
setwd("C:/folder_name")# set working directory with the occurrences and  
environmental rasters.
```

```
# Install the R package ENMeval and the complementary libraries (e.g.  
dismo, raster, rgdal).
```

```
library(ENMeval)#upload ENMeval.
```

```
occ<-read.table("occurrences_original.csv", head=T, sep=",")#upload the  
occurrences file in Maxent format (i.e., three columns: species,  
longitude, latitude).
```

```
occ<-occ[,c(2,3)]#Use information in columns 2 and 3.
```

```
env<-raster("Bio1.tif")#Upload one of the rasters that will be used for  
model calibration.
```

```
plot(env)#Display the raster
```

```
points(occ)#display the occurrences
```

```
#Split of occurrences
```

```
bg<-as.data.frame(env, xy=T)#Set the occurrences as data frame.
```

```
block_df<-get.block (occ, bg)#Split occurrences in block (see Muscarella  
et al. 2013. Ecography)
```

```
occ$group<-block_df$occ.grp#Assign occurrences into four groups (1, 2, 3,  
and 4).
```

```
#Display occurrences by group.
```

```
plot(occ$DecimalLongitude, occ$DecimalLatitude, pch=".",  
col=rainbow(7)[occ$group])
```

```
cal<-occ[which(occ$group %in% c(1,4)),]#Calibration occurrences from  
groups 1 and 4, i.e., off diagonal.
```

```
evl<-occ[which(occ$group %in% c(2,3)),]#Evaluation occurrences from groups  
2 and 3, i.e., off diagonal.
```

```
#Save one group of occurrences as cal.csv
```

```
write.table(cal, "cal.csv", row.names = F, sep=",")#Save Calibration  
occurrences as .csv file.
```

```
#Save one group of occurrences as evl.csv
```

```
write.table(evl, "evl.csv", row.names = F, sep=",")#Save Calibration  
occurrences as .csv file.
```
