# Supplementary material for: Novel Methods in Disease Biogeography: A Case Study with Heterosporosis
Source: PubMed Central journal article supplement (PMC5511963; doi:10.3389/fvets.2017.00105), 2017-07-17

#### 4 Supplementary Material S5

. **Model evaluation results.** Evaluation of models calibrated with off-diagonal occurrences. Occurrences where split in four quadrants based on the longitude and latitude values as in (Peterson, 2012):

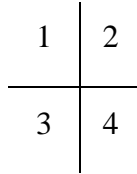

Occurrences from quadrants 1 and 4 were grouped and named **A**, while occurrences in quadrants 2 and 3 were grouped and denoted **B**. Models were calibrated with **A** and evaluated later with **B** and vice versa. Evaluations were based on the number of independent points predicted correctly and the proportion of area predicted suitable by the models to estimate *p-values*:

| <b>Model</b> | <b>Algorithm</b> | <b>All occurrences</b> |                        | <b>Not outlier Occurrences</b> |                        |
|--------------|------------------|------------------------|------------------------|--------------------------------|------------------------|
|              |                  | <b>A vs B</b>          | <b>B vs A</b>          | <b>A vs B</b>                  | <b>B vs A</b>          |
| $N_F$        | MEV              | $5.76 \times 10^{-3}$  | $1.56 \times 10^{-4}$  | $1.56 \times 10^{-3}$          | $4.41 \times 10^{-4}$  |
| $N_R$        | Marble           | $5.33 \times 10^{-15}$ | $1.25 \times 10^{-13}$ | $4.15 \times 10^{-4}$          | $2.64 \times 10^{-9}$  |
| $N_F$        | Maxent           | $5.80 \times 10^{-8}$  | 0.0                    | $8.02 \times 10^{-7}$          | 0.0                    |
| $N_R$        | Maxent           | 0.0                    | $1.89 \times 10^{-13}$ | 0.0                            | $3.24 \times 10^{-11}$ |

$N_F$  = Fundamental niche estimation.  $N_R$  = Realized niche estimation. MVE = Minimum-volume ellipsoid. A = occurrences of geographic quadrants 1 and 4. B = occurrences of geographic quadrants 2 and 3.

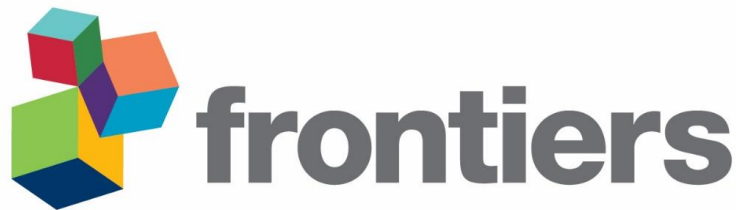

Supplement: data_sheet_5.pdf [file data_sheet_5.pdf]
